# Supplementary material for: Development of scalable and versatile nanomaterial libraries for nanosafety studies: polyvinylpyrrolidone (PVP) capped metal oxide nanoparticles
Source: Royal Society of Chemistry journal article supplement (doi:10.1039/c6ra25064e), 2017-01-01
Supplement: c6ra25064e1.pdf [file c6ra25064e1.pdf]

## Supporting Information

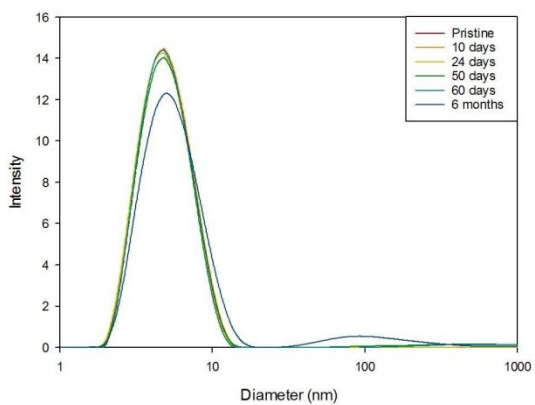

Figure S.1 10 K PVP capped ceria DLS size measurements taken over 6 months to show an example of stability at room temperature for 6 months.

Table S.1 Examples of DLS sizes of different PVP capped metal oxide NP batches.

| Sample   | Z-Average (nm) | PDI           |
|----------|----------------|---------------|
| 10 K Ce  | 5.874 ± 0.055  | 0.147 ± 0.029 |
| 10 K Ce  | 5.232 ± 0.069  | 0.168 ± 0.021 |
| 40 K Ce  | 7.325 ± 0.100  | 0.191 ± 0.016 |
| 40 K Ce  | 8.846 ± 0.068  | 0.194 ± 0.099 |
| 40 K Ce  | 7.906 ± 0.104  | 0.178 ± 0.022 |
| 360 K Ce | 19.42 ± 0.049  | 0.320 ± 0.003 |
| 360 K Ce | 17.43 ± 0.199  | 0.299 ± 0.005 |
| 10 K Zn  | 5.291 ± 0.103  | 0.225 ± 0.016 |
| 40 K Zn  | 9.275 ± 0.339  | 0.202 ± 0.024 |
| 40 K Zn  | 8.075 ± 0.376  | 0.267 ± 0.024 |
| 360 K Zn | 19.41 ± 1.272  | 0.354 ± 0.040 |
| 10 K Cu  | 5.338 ± 0.249  | 0.240 ± 0.008 |
| 40 K Cu  | 6.900 ± 1.960  | 0.227 ± 0.018 |
| 360 K Cu | 20.10 ± 3.361  | 0.319 ± 0.072 |

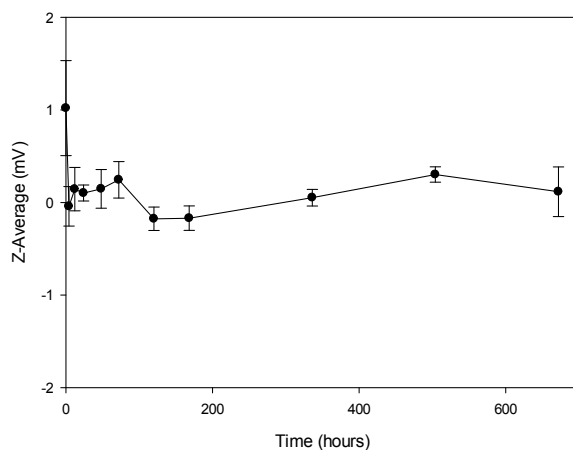

Figure S.2 10 K PVP capped ceria zeta potential measurements taken over one month to show an example of surface charge stability at room temperature for one month.
